# Supplementary material for: Improving Adherence to Physical Therapy in the Development of Serious Games: Conceptual Framework Design Study
Source: PubMed Central journal article supplement (PMC10674146; doi:10.2196/39838), 2023-11-10
Supplement: formative_v7i1e39838_app2.pdf [file formative_v7i1e39838_app2.pdf]

## Multimedia Appendix 2

Key adherence factors identified.

| Author                    | Key adherence factors                                                                                                                                                                                                                                                                                                                                |
|---------------------------|------------------------------------------------------------------------------------------------------------------------------------------------------------------------------------------------------------------------------------------------------------------------------------------------------------------------------------------------------|
| Essery et al. [38]        | Motivation<br>Perception of therapy<br>Self-Efficacy<br>Perceptions of illness, condition, or injury<br>Formal support (healthcare professional)<br>Natural social support (family and friends)<br>Feedback                                                                                                                                          |
| Collado-Mateo et al. [39] | Motivation<br>Perception of therapy<br>Self-Efficacy<br>Initial exploration<br>Exercise history<br>Formal support (healthcare professional)<br>Natural social support (family and friends)<br>Social support by the community<br>Personalized exercise program<br>The use of technology<br>Feedback<br>Available Progress Information and Monitoring |
| Farrance et al. [40]      | Motivation<br>Perception of therapy<br>Initial exploration<br>Instructor behaviours (support by healthcare professional)<br>Social connectedness (Social support by the community)<br>Feedback<br>Accessibility                                                                                                                                      |
| Rodrigues et al. [41]     | Motivation<br>Perception of therapy<br>Formal support (healthcare professional)<br>Opportunity for social interactions<br>Flexible program time and modification to exercise plan<br>Feedback<br>Accessibility (Location in a secure, pleasant, or natural environment)                                                                              |
| Room et al. [42]          | Motivation<br>Self-Efficacy<br>Motivation and intention<br>Social support<br>Feedback                                                                                                                                                                                                                                                                |
| Jordan et al. [43]        | Motivation                                                                                                                                                                                                                                                                                                                                           |

|                        |                                                                                                                                                                                                                                                                                                     |
|------------------------|-----------------------------------------------------------------------------------------------------------------------------------------------------------------------------------------------------------------------------------------------------------------------------------------------------|
|                        | <p>Self-Efficacy<br/> Social support<br/> Personalized exercise program<br/> Measure of exercise performance<br/> Feedback<br/> Accessibility</p>                                                                                                                                                   |
| Picorelli et al. [44]  | <p>Motivation<br/> Perception of therapy<br/> Self-Efficacy<br/> Social support<br/> Personalized exercise program<br/> Feedback<br/> Accessibility</p>                                                                                                                                             |
| Deka et al. [45]       | <p>Motivation<br/> Self-Efficacy<br/> Formal support (healthcare professional)<br/> Group support<br/> Supervision of exercise<br/> Feedback<br/> Accessibility<br/> Exercise equipment</p>                                                                                                         |
| Vseteckova et al. [46] | <p>Motivation<br/> Perception of therapy<br/> Self-Efficacy<br/> Initial exploration<br/> Social support<br/> Feedback<br/> Accessibility</p>                                                                                                                                                       |
| Dobson et al. [47]     | <p>Motivation<br/> Perception of therapy<br/> Self-Efficacy<br/> Exercise history<br/> Social support<br/> Feedback<br/> Environmental Context and Resources</p>                                                                                                                                    |
| Holt et al. [48]       | <p>Motivation<br/> Perception of therapy<br/> Initial exploration<br/> Exercise history<br/> Formal support (healthcare professional)<br/> Natural social support (family and friends)<br/> Social support by the community<br/> Personalized exercise program<br/> Feedback<br/> Accessibility</p> |

|                            |                                                                                                                                                                                                                                                                                                                                                                                                                                                                                                                                     |
|----------------------------|-------------------------------------------------------------------------------------------------------------------------------------------------------------------------------------------------------------------------------------------------------------------------------------------------------------------------------------------------------------------------------------------------------------------------------------------------------------------------------------------------------------------------------------|
|                            | <ul style="list-style-type: none"> <li>Physical environment</li> <li>Program details</li> <li>Diary keeping</li> <li>Reinforcement</li> </ul>                                                                                                                                                                                                                                                                                                                                                                                       |
| Walker et al. [49]         | <ul style="list-style-type: none"> <li>Motivation</li> <li>Perception of therapy</li> <li>Self-Efficacy</li> <li>Initial exploration</li> <li>Exercise history</li> <li>Formal support (healthcare professional)</li> <li>Natural social support (family and friends)</li> <li>Social support by the community</li> <li>Personalized exercise program</li> <li>Assessment of progress</li> <li>Feedback</li> <li>Exercise equipment</li> <li>Progress changeability</li> <li>Acceptance</li> <li>Comfort and convenience</li> </ul> |
| Rodrigues et al. [50]      | <ul style="list-style-type: none"> <li>Motivation</li> <li>Formal support (healthcare professional)</li> <li>Feedback</li> </ul>                                                                                                                                                                                                                                                                                                                                                                                                    |
| de Lacy-Vawdon et al. [51] | <ul style="list-style-type: none"> <li>Motivation</li> <li>Self-Efficacy</li> <li>Social support</li> <li>Personalized exercise program</li> <li>Feedback</li> <li>Progress changeability</li> </ul>                                                                                                                                                                                                                                                                                                                                |
| Nicolson et al. [52]       | <ul style="list-style-type: none"> <li>Motivation</li> <li>Perception of therapy</li> <li>Self-Efficacy</li> <li>Formal support (healthcare professional)</li> <li>Personalized exercise program</li> <li>Feedback</li> </ul>                                                                                                                                                                                                                                                                                                       |
