# Supplementary material for: Improving Adherence to Physical Therapy in the Development of Serious Games: Conceptual Framework Design Study
Source: PubMed Central journal article supplement (PMC10674146; doi:10.2196/39838), 2023-11-10
Supplement: formative_v7i1e39838_app3.pdf [file formative_v7i1e39838_app3.pdf]

### Multimedia appendix 3

#### Concept integration.

In compiling the results, several concepts were similar enough to be combined, for example, comfort and convenience, use of exercise equipment, and physical environment are part of accessibility; the ability to modify progress is part of a personalized exercise program. The table shows concept integration, where concepts on the same row are similar in meaning.

| Key adherence factor                                                                                                                                                                                                                                                     | Concept integration                      |
|--------------------------------------------------------------------------------------------------------------------------------------------------------------------------------------------------------------------------------------------------------------------------|------------------------------------------|
| Motivation                                                                                                                                                                                                                                                               | Motivation                               |
| Perception of therapy                                                                                                                                                                                                                                                    | Perception of therapy                    |
| Self-efficacy                                                                                                                                                                                                                                                            | Self-efficacy                            |
| Initial exploration<br>Exercise history<br>Perceptions of illness, condition, or injury                                                                                                                                                                                  | Initial exploration and exercise history |
| Formal support (healthcare professional)<br>Natural social support (family and friends)<br>Social support by the community<br>Instructor behaviours (support by healthcare professional)<br>Social connectedness<br>Group support<br>Opportunity for social interactions | Social support                           |
| Accessibility<br>Exercise equipment<br>Physical environment<br>Comfort and convenience                                                                                                                                                                                   | Accessibility                            |
| Personalized exercise program<br>Progress changeability<br>Flexible program time and modification to exercise plan                                                                                                                                                       | Adaptivity                               |
| Feedback<br>Reinforcement                                                                                                                                                                                                                                                | Feedback                                 |
| Use of technology to record the frequency, duration, and time of the exercises<br>Measure of exercise performance<br>Supervision of exercise<br>Diary keeping<br>Available Progress Information and Monitoring<br>Assessment of progress                                 | Available progress information           |
